# Supplementary material for: Tailoring the electronic environment of MoSe2via cation metal doping for the enhanced alkaline hydrogen evolution reaction
Source: Royal Society of Chemistry journal article supplement (doi:10.1039/d3nj04920e), 2024-01-01
Supplement: d3nj04920e1.pdf [file d3nj04920e1.pdf]

## Supporting Information

### Tailoring the electronic environment of MoSe<sub>2</sub> via cation metal doping for enhanced alkaline hydrogen evolution reaction

Saman Sajjad,<sup>ac</sup> Jiawei Ke,<sup>a</sup> Tianheng Du,<sup>a</sup> Jiabo Wang,<sup>a</sup> Lifang Zhang,<sup>a</sup> Yufei Li,<sup>d</sup> Bin He,<sup>e</sup> Tongfei Li,<sup>\*a</sup> Tao Qian,<sup>a</sup> and Chenglin Yan<sup>\*bc</sup>

<sup>a</sup>School of Chemistry and Chemical Engineering, Nantong University, Nantong 226019, China

E-mail: [litongfei@ntu.edu.cn](mailto:litongfei@ntu.edu.cn) (T. Li)

<sup>b</sup>School of Petrochemical Engineering, Changzhou University, Changzhou 213164, China

<sup>c</sup>Key Laboratory of Advanced Carbon Materials and Wearable Energy Technologies of Jiangsu Province, College of Energy, Soochow University, Suzhou 215006, China

E-mail: [c.yan@suda.edu.cn](mailto:c.yan@suda.edu.cn) (C. Yan)

<sup>d</sup>Pinghu Institute of Advanced Materials, Zhejiang University of Technology, Pinghu 314200, China

<sup>e</sup>Department of Materials Engineering, Huzhou University, Huzhou 313000, China

## Experimental Section

### *Materials and Chemicals*

Nickle nitrate hexahydrate ( $\text{Ni}(\text{NO}_3)_2 \cdot 6\text{H}_2\text{O}$ ), cobalt nitrate hexahydrate ( $\text{Co}(\text{NO}_3)_2 \cdot 6\text{H}_2\text{O}$ ), and hydrazine hydrate ( $\text{N}_2\text{H}_4 \cdot \text{H}_2\text{O}$ , 85%) were purchased from Sinopharm Chemical Reagent Co., Ltd. China. Iron nitrate nonahydrate ( $\text{Fe}(\text{NO}_3)_3 \cdot 9\text{H}_2\text{O}$ ), sodium molybdate ( $\text{Na}_2\text{MoO}_4 \cdot 2\text{H}_2\text{O}$ ), and selenium powder (Se, 99.9%) were supplied by Sigma-Aldrich. All chemical reagents were used as received without further purification.

### *Synthesis of NiFe@MoSe<sub>2</sub> nanosheets*

In a typical synthesis of NiFe@MoSe<sub>2</sub> nanosheets, 4 mmol of Se was added to 10 ml of  $\text{N}_2\text{H}_4 \cdot 2\text{H}_2\text{O}$  in a separate flask and stirred continuously for about 1.5 h. Then, 2 mmol of  $\text{Na}_2\text{MoO}_4 \cdot 2\text{H}_2\text{O}$ , 0.02 mmol of  $\text{Ni}(\text{NO}_3)_2 \cdot 6\text{H}_2\text{O}$  and 0.02 mmol of  $\text{Fe}(\text{NO}_3)_3 \cdot 9\text{H}_2\text{O}$  were dispersed in 50 ml  $\text{H}_2\text{O}$  with continuous stirring to form a clear solution. After stirring, the Se solution was slowly added to the  $\text{Na}_2\text{MoO}_4$  solution and the mixed solution was an orange-red color. Then, the reaction solutions were transferred to a Teflon-lined stainless autoclave and kept at 220 °C for 20 h for hydrothermal treatment. After natural cooling down to room temperature, the as-synthesized black precipitates were collected by centrifugation at 10000 rpm for 5 min and washed several times with D.I water, then dried in a freeze dryer for 24 h. Finally, the NiFe@MoSe<sub>2</sub> nanosheets were obtained. For comparison, NiCo@MoSe<sub>2</sub> and FeCo@MoSe<sub>2</sub> electrocatalysts were also synthesized by the same procedure as the preparation of NiFe@MoSe<sub>2</sub> nanosheets, except that the metal species were changed with  $\text{Ni}^{2+}/\text{Co}^{2+}$ , and  $\text{Fe}^{3+}/\text{Co}^{2+}$ ,

respectively. The preparation of pure MoSe<sub>2</sub> nanosheets was the same as that of NiFe@MoSe<sub>2</sub> except that Ni(NO<sub>3</sub>)<sub>2</sub>·6H<sub>2</sub>O and Fe(NO<sub>3</sub>)<sub>2</sub>·9H<sub>2</sub>O were removed.

#### *Materials characterization*

The crystal structure was analyzed by X-ray diffraction (XRD, Bruker D8 Advance with Cu K $\alpha$ ,  $\lambda = 1.5406 \text{ \AA}$ ). The microstructure and morphology of the samples images were observed on a field emission scanning electron microscopy (FE-SEM) from JEOL (JSM-7800F) and a transmission electron microscopy (TEM, JEM-2100F, JEOL), respectively. X-ray photoelectron spectroscopy (XPS, Thermo Scientific, ESCALAB 250Xi) was employed to identify the chemical composition and electronic states of the samples, and the binding energy was calibrated against the C 1s peak energy of 284.6 eV. Raman spectra were recorded by a LaBRAM HR800 (Jobin Yvon Horiba) Raman spectrometer ( $\lambda = 532 \text{ nm}$ ).

#### *Electrochemical measurements*

All the electrochemical measurements were performed by a CHI 760E electrochemical workstation (CHI Instruments Inc.) in N<sub>2</sub>-purged 1.0 M KOH aqueous solution. Ag/AgCl electrode and carbon rod were used as the reference electrode and the counter electrode, respectively. The catalyst ink was prepared as follows: the electrocatalyst powders (8 mg) and 2 mg of acetylene black were dispersed into 50  $\mu\text{L}$  of Nafion, 600  $\mu\text{L}$  of deionized water and 350  $\mu\text{L}$  of ethanol and ultrasonicated for 30 min to generate a homogeneous slurry. Then 10  $\mu\text{L}$  of the resulting suspension was sprayed onto the surface of the glass carbon and dried at room temperature as the working electrode. The linear sweep voltammograms (LSVs) were measured from high potential to low

potential at a scan rate of 5 mV s<sup>-1</sup>. The turnover frequency (TOF) was evaluated by the following standard equation:  $TOF = J * A / 2 * F * n$ . Here,  $J$  is the current density (mA cm<sup>-2</sup>) at an overpotential of 300 mV;  $A$  is the area of electrode;  $n$  is the moles of active metal atoms;  $F$  is the Faraday constant (96485 C mol<sup>-1</sup>). The corresponding Tafel slope-  
reflected reaction kinetics was calculated by the formula:  $\eta = a + b \log j$  where  $\eta$ ,  $b$ , and  $j$  represent potential, Tafel slope, and current density, respectively. By plotting graph between the potential and log (current density), Tafel slopes were obtained from the polarization curves. Electrochemical impedance spectroscopy (EIS) was tested in the frequency range of 100,000 ~0.01 Hz at the open circuit potential. The cyclic voltammetry (CV) tests were conducted in a potential range of 0.12-0.22 V (vs RHE) at a scan rate range of 20-100 mV s<sup>-1</sup> to receive the electrochemical active surface area (ECSA). The  $C_{dl}$  calculation ( $C_{dl} = (j_a - j_c)/(2*v) = (j_a + |j_c|)/(2*v) = \Delta j/(2*v)$ ), where  $j_a$  and  $j_c$  are the anodic and cathodic voltammetric current density, respectively, and  $v$  is the scan rate. All potentials were presented with respect to the reversible hydrogen electrode (RHE) in this work:  $E_{RHE} = E_{Ag/AgCl} + 0.197 \text{ V} + 0.059 \times \text{pH}$ .

## Figures and Table

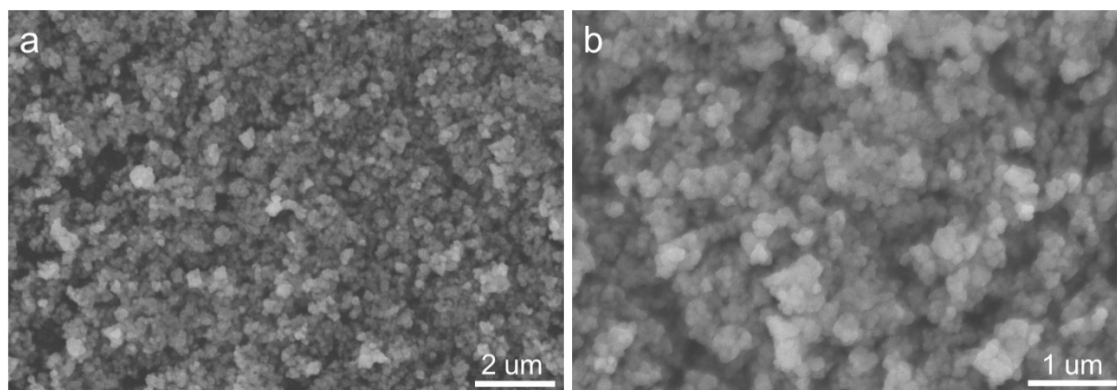

**Figure S1.** SEM image of the resultant MoSe<sub>2</sub>.

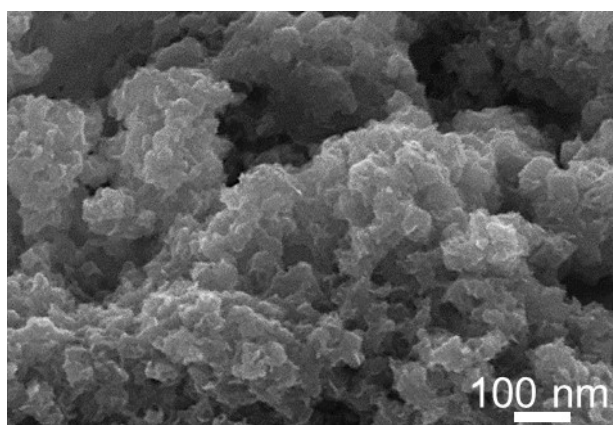

**Figure S2.** High-resolution SEM image of NiFe@MoSe<sub>2</sub>.

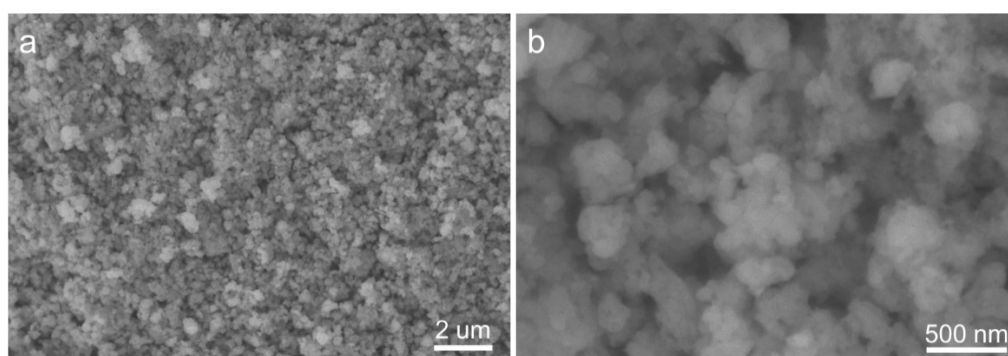

**Figure S3.** SEM image of the FeCo@MoSe<sub>2</sub> species.

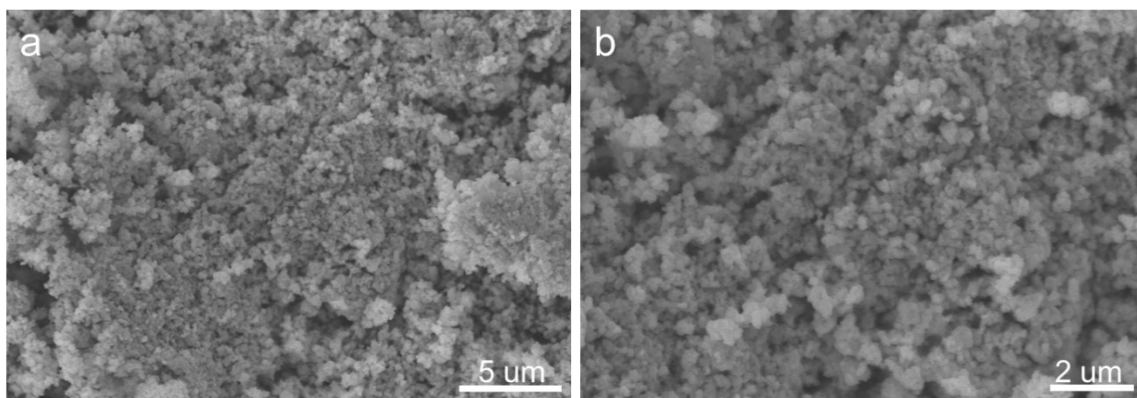

**Figure S4.** SEM images of the formed NiCo@MoSe<sub>2</sub>.

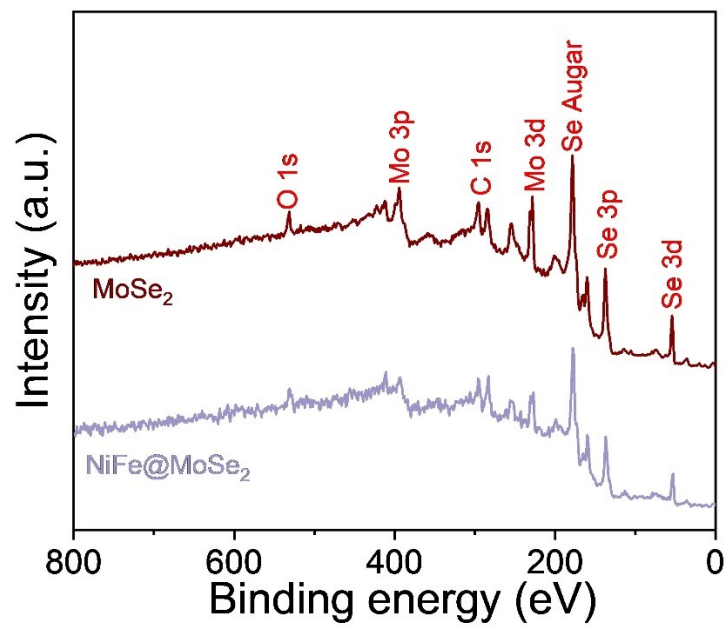

**Figure S5.** XPS survey spectrum of NiFe@MoSe<sub>2</sub>.



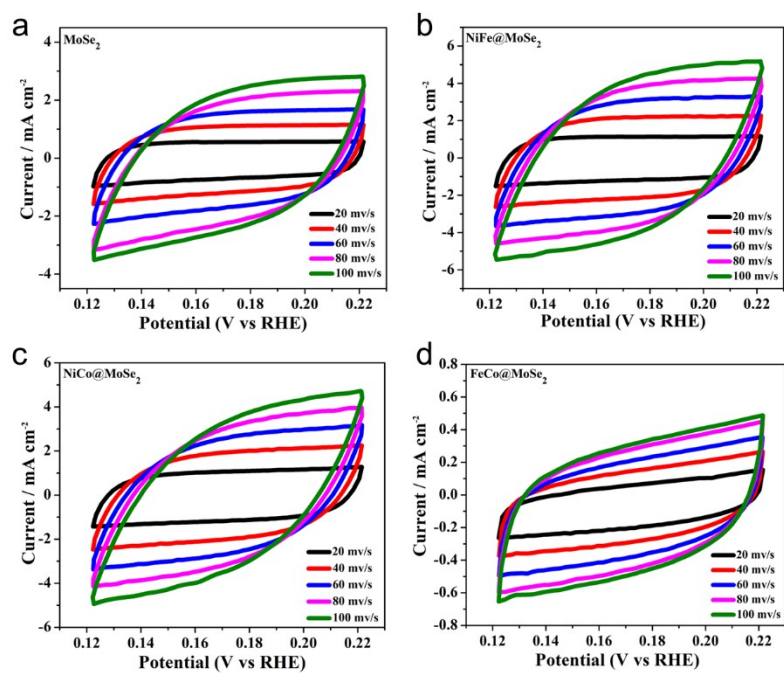

**Figure S6.** CV curves of the synthesized catalysts in the non-Faradaic region (0.12 – 0.22 V vs. RHE) obtained at different scanning rates. (a) MoSe<sub>2</sub>, (b) NiFe@MoSe<sub>2</sub>, (c) NiCo@MoSe<sub>2</sub>, and (d) FeCo@MoSe<sub>2</sub>.

**Table S1.** HER performance comparison between the as-synthesized NiFe@MoSe<sub>2</sub> and representative nonprecious catalysts reported previously.

| Catalyst                                             | Overpotential / mV<br>(10 mA cm <sup>-2</sup> ) | Tafel slope<br>(mV dec <sup>-1</sup> ) | Ref.                                                   |
|------------------------------------------------------|-------------------------------------------------|----------------------------------------|--------------------------------------------------------|
| NiFe@MoSe <sub>2</sub>                               | 146                                             | 79                                     | This work                                              |
| Co <sub>0.5</sub> Mo <sub>0.5</sub> S                | 181                                             | N/A                                    | <i>ACS Appl. Energy Mater.</i> 2022, 5, 10396–10401.   |
| Ni-Co <sub>3</sub> S <sub>4</sub>                    | 262                                             | 81.2                                   | <i>ACS Appl. Nano Mater.</i> 2022, 5, 7, 9901–9909.    |
| Co <sub>9</sub> S <sub>8</sub> /Cu <sub>2</sub> S/CF | 165                                             | 80.2                                   | <i>ACS Appl. Interface Mater.</i> 2021, 13, 9865–9874. |
| MnCo-CH@NiFe-OH                                      | 177                                             | 97.8                                   | <i>Appl. Catal. B: Environ.</i> 2021, 292, 120160.     |
| MoO <sub>2</sub> NPs@N-C NSs/NF                      | 160                                             | 92.9                                   | <i>Energy Fuels</i> 2020, 34, 9050–9057.               |
| Co <sub>1.11</sub> Te <sub>2</sub> /C                | 178                                             | 77.3                                   | <i>Appl. Catal. B: Environ.</i> 2019, 244, 568-575.    |
| CoPS@NPS-C                                           | 191                                             | 106                                    | <i>J. Mater. Chem. A</i> 2018, 6:10433–10440.          |
| Cu <sub>0.3</sub> Co <sub>2.7</sub> P/NC             | 220                                             | 122                                    | <i>Adv. Energy Mater.</i> 2017, 7, 1601555.            |
| NiFeOF                                               | 253                                             | 96                                     | <i>ACS Catal.</i> 2017, 7, 8406-8412.                  |
